# Supplementary material
Source: Research Square preprint supplement (doi:10.21203/rs.3.rs-8950795/v1)
Supplement: Supplementary file 1 [file 9d2a4a4e93ed7bee9a148b00.xlsx]

## Sheet: 1. subs_per_yr
year	submissions
2018	5588
2019	4703
2020	3469
2021	341
2022	514
2023	339
2024	281

## Sheet: 2. subs_per_state
state	submissions	subs_per_pop
Alabama	301	5.98
Alaska	50	6.8
Arizona	288	3.93
Arkansas	309	10.17
California	804	2.04
Colorado	325	5.58
Connecticut	255	7.07
Delaware	130	12.92
District of Columbia	230	33.45
Florida	598	2.7
Georgia	515	4.75
Hawaii	97	6.75
Idaho	65	3.44
Illinois	605	4.77
Indiana	410	6.02
Iowa	212	6.64
Kansas	163	5.55
Kentucky	384	8.51
Louisiana	251	5.43
Maine	154	11.2
Maryland	408	6.62
Massachusetts	523	7.47
Michigan	535	5.32
Minnesota	369	6.47
Mississippi	131	4.43
Missouri	428	6.93
Montana	45	4.08
Nebraska	139	7.07
Nevada	182	5.78
New Hampshire	125	9.03
New Jersey	519	5.63
New Mexico	122	5.77
New York	651	3.3
North Carolina	512	4.81
North Dakota	65	8.36
Ohio	525	4.46
Oklahoma	257	6.42
Oregon	212	5
Pennsylvania	553	4.27
Rhode Island	86	7.89
South Carolina	280	5.34
South Dakota	35	3.89
Tennessee	370	5.29
Texas	577	1.94
Utah	147	4.41
Vermont	91	14.21
Virginia	439	5.07
Washington	280	3.61
West Virginia	118	6.61
Wisconsin	346	5.88
Wyoming	19	3.27
Puerto Rico

## Sheet: 3. ppg_per_state
state	rml_outlet_date	Never	Med	Rec
Rhode Island	2022-12-01		8	4.02
Maine	2020-10-10		6.43	4.64
Maryland	2023-07-01		8.93	5
Oregon	2015-10-01			5.36
Washington	2014-07-01			5.71
Colorado	2014-01-01			6.07
New York	2022-12-29		8.57	6.43
Arizona	2021-01-22		8	7.14
California	2018-01-01			7.14
Connecticut	2023-01-10		8.93	7.14
Michigan	2019-12-01		8	7.14
Missouri	2023-02-03	9.64	8.93	7.14
Nevada	2017-07-01			7.14
New Jersey	2022-04-21		8.93	7.14
Vermont	2022-05-01		10	7.14
Massachusetts	2018-11-01		8.57	8.57
Montana	2022-01-01		10	8.75
Illinois	2020-01-01		10	8.93
New Mexico	2022-04-01		9	8.93
Alaska	2016-10-01			10
Alabama		9.29
Arkansas		10	9.29
Delaware			8.75
District of Columbia			10
Florida			8.93
Georgia		9.82	8.93
Hawaii			10
Idaho		7.14
Indiana		8.93
Iowa		10	9.73
Kansas		8.93
Kentucky		8.93
Louisiana		10	8.57
Minnesota			8.57
Mississippi		10	10
Nebraska		8.57
New Hampshire			7.86
North Carolina		10
North Dakota		10.36	10
Ohio	2024-08-06	9.64	8.93
Oklahoma		10	10
Pennsylvania			8.93
South Carolina		8.93
South Dakota		9.46	11.43
Tennessee		10
Texas		8.57
Utah		7.14	9.04
Virginia		10	8.57
West Virginia		10	10
Wisconsin		8.93
Wyoming		7.14

## Sheet: 4. ppg_med_v_no
Median Price Per Gram
	2018			2019			2020			2021			2022			2023			2024
Dispensary status	Med N = 2,213	Never N = 2,633	p-value	Med N = 2,309	Never N = 1,642	p-value	Med N = 1,435	Never N = 1,212	p-value	Med N = 134	Never N = 104	p-value	Med N = 220	Never N = 142	p-value	Med N = 132	Never N = 88	p-value	Med N = 87	Never N = 75	p-value
Price($)/gram	8.9	10	0.2	8.6	8.9	0.2	8.9	9.8	0.071	8.6	8.9	0.13	8.6	8.1	0.8	7.9	8	0.7	7.1	7.1	0.2
Median
Wilcoxon rank sum test
